# Supplementary material
Source: Elsevier journal article supplement (https://www.sciencedirect.com/science/article/pii/S2341287922001740)
Supplement: mmc1 [file S2341287922001740:mmc1.docx]

**Tabla Suplementaria. Somatometría a los 2 años de edad corregida en menores de 1500 gramos en función de si tenían antecedente de BPEG (en INTERGROWTH-21st y Fenton 2013).**

| **INTERGROWTH-21st** | | | |
| --- | --- | --- | --- |
| Variable | BPEG n=181 (35,6 %) | No-BPEG n=331 (64,4%) | P valor |
| Talla (DS) | -1,15±1,19 | -0,74±1,16 | <0,0001 |
| Peso (DS) | -1,07±1,16 | -0,47±1,13 | <0,0001 |
| IMC (DS) | -0,46±1,22 | -0,01±1,13 | <0,0001 |
| PC (DS) | -0,12±1,23 | 0,5±22 | <0,0001 |
| Talla < -2DS | 23,8 % (43) | 13,6% (45) | 0,004 |
| Talla < -1 DS | 58% (105) | 39,6 % (131) | <0,0001 |
| **FENTON 2013** | | | |
| Variable | BPEG n=189 (36,8%) | No-BPEG n=324 (63,1%) | P valor |
| Talla (DS) | -1,22±1,17 | -0,69±1,15 | <0,0001 |
| Peso (DS) | -1,08±1,16 | -0,45±1,12 | <0,0001 |
| IMC (DS) | -0,40±1,24 | -0,03±1,13 | 0,001 |
| PC (DS) | -0,15±1,22 | 0,53±1,22 | <0,0001 |
| Talla < -2DS | 24,9% (47) | 12,7% (41) | <0,0001 |
| Talla < -1 DS | 59,3% (112) | 38,4% (124) | <0,0001 |

DS: desviación estándar. IMC: índice de masa corporal. PC: perímetro craneal. BPEG: bajo peso para la edad gestacional (peso al nacimiento < percentil 10). No-BPEG: no Bajo peso para la edad gestacional (peso al nacimiento ≥ percentil 10).
